# Supplementary material
Source: MDPI journal article supplement (https://www.mdpi.com/2071-1050/16/2/849)
Supplement: s1 [file s1]

Archive with 2 entries (2 files):
- 2024_Ecological_sorrow_Supplement_2.pdf
- Ecological Sorrow_Supplement_1.pdf
