# Supplementary material
Source: MDPI journal article supplement (https://www.mdpi.com/2071-1050/16/2/849)
Supplement: s1 [file s1 › 2024_Ecological_sorrow_Supplement_2.pdf]

# Ecological Sorrow: Types of grief and loss in ecological grief

Sustainability (2024)

Panu Pihkala, University of Helsinki

## Supplement 2: Selected important sources

The selection of ecological grief sources also serves as an example of chronology in research.

### a) Ecological grief

| Source                                                                                                                                                                                                                    | Brief description                                                                                                                                                                                           |
|---------------------------------------------------------------------------------------------------------------------------------------------------------------------------------------------------------------------------|-------------------------------------------------------------------------------------------------------------------------------------------------------------------------------------------------------------|
| Macy, J. (1983) <i>Despair and personal power in the nuclear age</i> . New Society Publishers: Philadelphia.                                                                                                              | An example of early eco-psychological writing about sadness and despair in relation to global problems such as nuclear threats and environmental problems.                                                  |
| Windle, P. (1995) 'The Ecology of Grief', in T. Roszak, M.E. Gomes, and A.D. Kanner (eds) <i>Ecopsychology: Restoring the earth, healing the mind</i> . San Francisco: Sierra Club, pp. 126–145.                          | An early and influential writing on grief about environmental damage, especially mentioning how environmentalists and researchers suffer from it.                                                           |
| Kevorkian, K.A. (2004) <i>Environmental grief: Hope and healing</i> . Unpublished Thesis. Cincinnati: Union Institute & University.                                                                                       | A thesis where the author proposes environmental grief as a term for related phenomena.                                                                                                                     |
| Albrecht, G. et al. (2007) 'Solastalgia: the distress caused by environmental change', <i>Australasian psychiatry: Bulletin of the Royal Australian and New Zealand College of Psychiatrists</i> , 15(S1), pp. S95–S98.   | An influential discussion of the new term solastalgia, developed by Albrecht to describe certain forms of sadness about environmental change.                                                               |
| Randall, R. (2009) 'Loss and climate change: The cost of parallel narratives', <i>Ecopsychology</i> , 1(3), pp. 118–129.                                                                                                  | One of the first applications of general grief research into environmental matters. Discusses several grief theories and uses Worden's task-based approach.                                                 |
| Cunsolo Willox, A. (2012) 'Climate Change as the Work of Mourning', <i>Ethics &amp; the Environment</i> , 17(2), pp. 137–164.                                                                                             | Applies philosophy and ethics into climate grief and proposes that mourning is an important aspect of engaging with climate change. The author also participated in empirical research about climate grief. |
| Cunsolo, A. and Landman, K. (eds) (2017) <i>Mourning Nature: Hope at the Heart of Ecological Loss &amp; Grief</i> . Montreal & Kingston: McGill-Queen's University Press.                                                 | The first collection of articles focusing solely on ecological grief.                                                                                                                                       |
| Cunsolo, A. and Ellis, N.R. (2018) 'Ecological grief as a mental health response to climate change-related loss', <i>Nature Climate Change</i> , 8(4), pp. 275–281.                                                       | A proposal for a categorization of various types of ecological grief, strongly focusing on climate grief. Much used by later studies on the topic.                                                          |
| Comtesse, H. et al. (2021) 'Ecological Grief as a Response to Environmental Change: A Mental Health Risk or Functional Response?', <i>International journal of environmental research and public health</i> , 18(2), 734. | Applies a wider array of grief theories into ecological grief and briefly discusses many dynamics of grief.                                                                                                 |
| Barnett, J.T. (2022) <i>Mourning in the Anthropocene: Ecological Grief and Earthly Coexistence</i> . East Lansing: Michigan State University Press.                                                                       | An example of a new wave of monographs about ecological grief. Explores the role of rhetorics in relation to the topic.                                                                                     |

## b) General grief research

These texts have been major sources for this research and provide additional information about the topics.

|                        |                                                                                                                                                                                                                                                                                                                                                                                                                                                                                                                                                                                                                                                                                                                                                                                                                                                                                                                                                                                                                                                                                                                                                                                                                                            |
|------------------------|--------------------------------------------------------------------------------------------------------------------------------------------------------------------------------------------------------------------------------------------------------------------------------------------------------------------------------------------------------------------------------------------------------------------------------------------------------------------------------------------------------------------------------------------------------------------------------------------------------------------------------------------------------------------------------------------------------------------------------------------------------------------------------------------------------------------------------------------------------------------------------------------------------------------------------------------------------------------------------------------------------------------------------------------------------------------------------------------------------------------------------------------------------------------------------------------------------------------------------------------|
| General books          | <p>Harris, D.L. (ed.) (2020) <i>Non-Death Loss and Grief: Context and Clinical Implications</i>. New York: Routledge. Available at: <a href="https://www.routledge.com/Non-Death-Loss-and-Grief-Context-and-Clinical-Implications/Harris/p/book/9781138320826">https://www.routledge.com/Non-Death-Loss-and-Grief-Context-and-Clinical-Implications/Harris/p/book/9781138320826</a> (Accessed: 23 January 2023).</p> <p>Hooyman, N.R. and Kramer, B.J. (2008) <i>Living through loss: Interventions across the life span</i>. New York: Columbia University Press (Foundations of social work knowledge).</p> <p>Neimeyer, R.A. et al. (eds) (2011) <i>Grief and bereavement in contemporary society: Bridging research and practice</i>. New York: Routledge (Series in death, dying, and bereavement).</p> <p>Parkes, C.M. and Prigerson, H.G. (2013) <i>Bereavement: studies of grief in adult life</i>. 4th ed. Routledge.</p> <p>Winokuer, H.R. and Harris, D. (2019) <i>Principles and Practice of Grief Counseling</i>. Third Edition. New York: Springer Publishing Company.</p> <p>Worden, J.W. (2018) <i>Grief counseling and grief therapy: a handbook for the mental health practitioner</i>. 5th edn. New York: Springer.</p> |
| Intangible loss        | <p>Harris, D.L. (2020) 'Tangible and Intangible Losses', in D.L. Harris (ed.) <i>Non-Death Loss and Grief: Context and Clinical Implications</i>. New York: Routledge, pp. 237–242.</p>                                                                                                                                                                                                                                                                                                                                                                                                                                                                                                                                                                                                                                                                                                                                                                                                                                                                                                                                                                                                                                                    |
| Ambiguous loss         | <p>Boss, P. (1999) <i>Ambiguous Loss: Learning to Live With Unresolved Grief</i>. Cambridge: Harvard University Press.</p>                                                                                                                                                                                                                                                                                                                                                                                                                                                                                                                                                                                                                                                                                                                                                                                                                                                                                                                                                                                                                                                                                                                 |
| Nonfinite loss         | <p>Bruce, E.J. and Schultz, C.L. (2001) <i>Nonfinite loss and grief: A psychoeducational approach</i>. Baltimore, Md.: Paul H. Brookes Pub.</p>                                                                                                                                                                                                                                                                                                                                                                                                                                                                                                                                                                                                                                                                                                                                                                                                                                                                                                                                                                                                                                                                                            |
| Shattered assumptions  | <p>Janoff-Bulman, R. (1992) <i>Shattered assumptions: Towards a new psychology of trauma</i>. New York &amp; Toronto: Free Press &amp; Maxwell Macmillan Canada.</p>                                                                                                                                                                                                                                                                                                                                                                                                                                                                                                                                                                                                                                                                                                                                                                                                                                                                                                                                                                                                                                                                       |
| Meaning reconstruction | <p>Neimeyer, R.A. et al. (2010) 'Grief Therapy and the Reconstruction of Meaning: From Principles to Practice', <i>Journal of Contemporary Psychotherapy</i>, 40(2), pp. 73–83.</p>                                                                                                                                                                                                                                                                                                                                                                                                                                                                                                                                                                                                                                                                                                                                                                                                                                                                                                                                                                                                                                                        |
| Disenfranchised grief  | <p>Doka, K.J. (ed.) (2002) <i>Disenfranchised grief: New directions, challenges, and strategies for practice</i>. Champaign, Ill.: Research Press Champaign, Ill.</p>                                                                                                                                                                                                                                                                                                                                                                                                                                                                                                                                                                                                                                                                                                                                                                                                                                                                                                                                                                                                                                                                      |
| Chronic sorrow         | <p>Roos, S. (2018) <i>Chronic sorrow: A living loss</i>. Second edition. New York: Routledge.</p>                                                                                                                                                                                                                                                                                                                                                                                                                                                                                                                                                                                                                                                                                                                                                                                                                                                                                                                                                                                                                                                                                                                                          |
| Anticipatory grief     | <p>Rando, T.A. (ed.) (1986) <i>Loss and Anticipatory Grief</i>. Lexington, Mass: The Free Press.</p>                                                                                                                                                                                                                                                                                                                                                                                                                                                                                                                                                                                                                                                                                                                                                                                                                                                                                                                                                                                                                                                                                                                                       |
| Complicated grief      | <p>Mason, T.M., Toftagen, C.S. and Buck, H.G. (2020) 'Complicated Grief: Risk Factors, Protective Factors, and Interventions', <i>Journal of social work in end-of-life &amp; palliative care</i>, 16(2), pp. 151–174.</p>                                                                                                                                                                                                                                                                                                                                                                                                                                                                                                                                                                                                                                                                                                                                                                                                                                                                                                                                                                                                                 |
| Prolonged grief        | <p>Szuhany, K.L. et al. (2021) 'Prolonged Grief Disorder: Course, Diagnosis, Assessment, and Treatment', <i>FOCUS</i>, 19(2), pp. 161–172. Available at: <a href="https://doi.org/10.1176/appi.focus.20200052">https://doi.org/10.1176/appi.focus.20200052</a>.</p>                                                                                                                                                                                                                                                                                                                                                                                                                                                                                                                                                                                                                                                                                                                                                                                                                                                                                                                                                                        |
