# Supplementary material
Source: MDPI journal article supplement (https://www.mdpi.com/2071-1050/16/2/849)
Supplement: s1 [file s1 › Ecological Sorrow_Supplement_1.pdf]

# Ecological Sorrow: Types of grief and loss in ecological grief

*Sustainability* (2024)

Panu Pihkala, University of Helsinki

## Supplement 1: Further information about sources and database searches

### Libraries and online sites

University of Helsinki Library and its wide-ranging electronic databases were mainly used, but during the years, some sources were found also via University of Chicago Library. GoogleScholar, Academia.edu and Researchgate were used to find open access electronic articles.

### Keywords

Even while this was not a systematic review of all available sources, numerous keyword searches were done over the years. The fact that many different terms are used (such as “environmental grief”, “solastalgia”, and “ecological grief”) made searches more complicated, as well as the fact that earlier sources do not necessarily use any environmental key term: they just discuss sadness or grief (or other related phenomena) as related to environmental issues. Regrettably, the author did not keep track of numbers of results for various searches.

### *Special search terms for ecological grief*

environmental grief  
ecological grief  
eco-grief  
climate grief  
climate sorrow  
climate sadness  
solastalgia  
earth grief  
environmental melancholia

### *Various combinations of the following were used:*

environment/ecology/climate + grief/sadness/sorrow

### *Types of loss and grief*

After consulting grief research, searches were made about various types of loss and grief in connection to environmental issues.

Intangible loss + ecological grief / environmental grief / solastalgia  
Ambiguous loss + ecological grief / environmental grief / solastalgia  
Nonfinite loss + ecological grief / environmental grief / solastalgia  
Shattered assumptions + ecological grief / environmental grief / solastalgia  
Meaning reconstruction + ecological grief / environmental grief / solastalgia  
Disenfranchised grief + ecological grief / environmental grief / solastalgia  
Anticipatory grief / anticipatory mourning + ecological grief / environmental grief / solastalgia  
Chronic sorrow + ecological grief / environmental grief / solastalgia  
Complicated grief / prolonged grief + ecological grief / environmental grief / solastalgia

Overall, there was not found many studies which would directly apply terms and frameworks from general grief research into ecological grief.
